# Supplementary material for: DNA Binding and Cleavage, Stopped-Flow Kinetic, Mechanistic, and Molecular Docking Studies of Cationic Ruthenium(II) Nitrosyl Complexes Containing “NS4” Core
Source: MDPI journal article supplement (doi:10.3390/molecules28073028), 2023-03-28
Supplement: s1 [file s1]

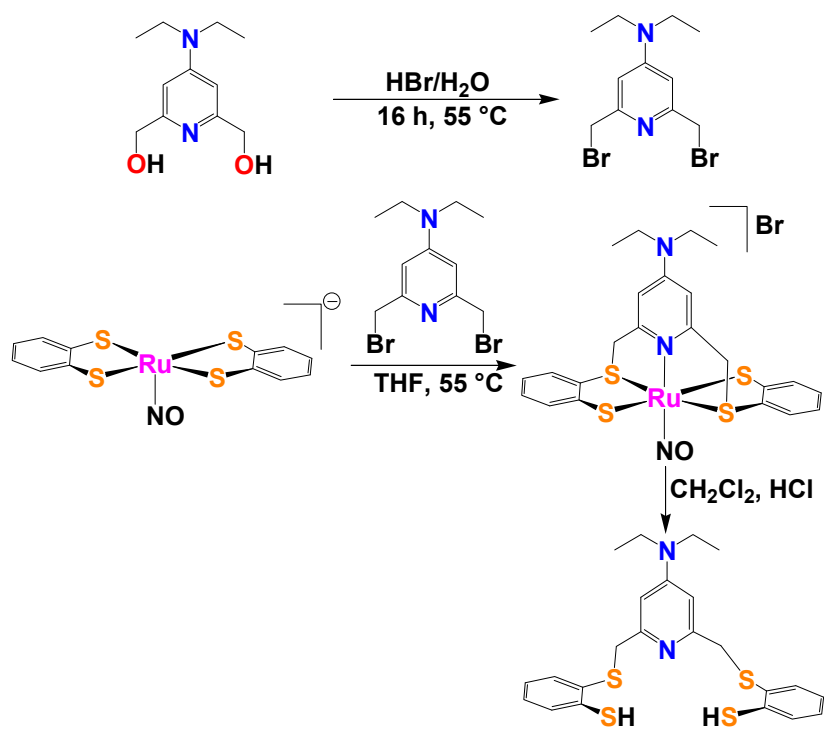

**Scheme S1:** Synthetic route for  $[\text{RuNOTSP}]\text{Br}$  and its ligand TSPH<sub>2</sub>, respectively

### Geometrical optimization:

Molecular geometry was optimized at the B3LYP level of theory using the bases 6-31 g(d) for **TSPH<sub>2</sub>** and **TSPH<sub>2</sub>** and LAN2DZ for metal in **[RuNOTSP]<sup>+</sup>**. Additional parameters such as HOMO–LUMO energy gap  $E_g$ , absolute electronegativities  $\chi$ , chemical potentials,  $\pi$ , absolute hardness,  $\eta$ , absolute softness,  $\sigma$ , global electrophilicity,  $\omega$ , global softness,  $S$ , and additional electronic charge,  $\Delta N_{\max}$ , can be defined using Koopman's theorem by the following equations:

$$E_g = E_{\text{LUMO}} - E_{\text{HOMO}}$$

$$\chi = -(E_{\text{HOMO}} + E_{\text{LUMO}}) / 2$$

$$\eta = (E_{\text{LUMO}} - E_{\text{HOMO}}) / 2$$

$$\sigma = 1/\eta$$

$$\pi = -\chi$$

$$S = 1/2\eta$$

$$\omega = \pi^2 / 2\eta$$

$$\Delta N_{\max} = \pi/\eta$$

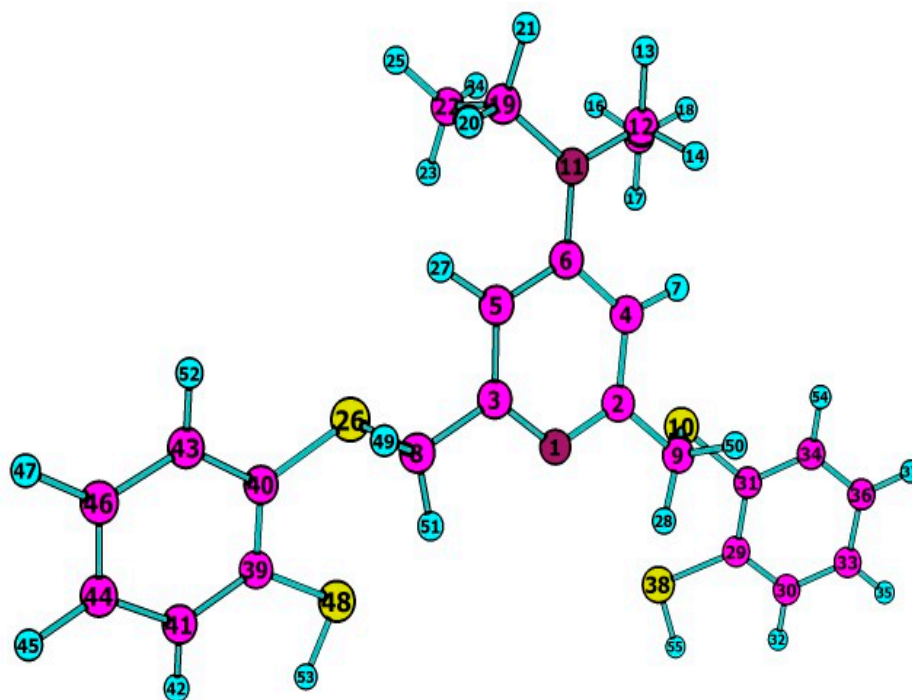

**Figure S1:** Structure of TSPH<sub>2</sub>

**Table S1. Summary of Natural Population Analysis (NPA) of TSPH<sub>2</sub>:**

| Atom | No | Charge   | Core    | Valence | Rydberg | Total    |
|------|----|----------|---------|---------|---------|----------|
| N    | 1  | -0.48666 | 1.99937 | 5.46670 | 0.02059 | 7.48666  |
| C    | 2  | 0.21078  | 1.99908 | 3.76504 | 0.02511 | 5.78922  |
| C    | 3  | 0.21077  | 1.99908 | 3.76505 | 0.02511 | 5.78923  |
| C    | 4  | -0.32176 | 1.99896 | 4.31209 | 0.01071 | 6.32176  |
| C    | 5  | -0.32175 | 1.99896 | 4.31207 | 0.01071 | 6.32175  |
| C    | 6  | 0.21820  | 1.99905 | 3.76378 | 0.01897 | 5.78180  |
| H    | 7  | 0.23970  | 0.00000 | 0.75905 | 0.00125 | 0.76030  |
| C    | 8  | -0.58698 | 1.99918 | 4.57423 | 0.01357 | 6.58698  |
| C    | 9  | -0.58699 | 1.99918 | 4.57424 | 0.01356 | 6.58699  |
| S    | 10 | 0.23735  | 9.99925 | 5.72735 | 0.03605 | 15.76265 |
| N    | 11 | -0.44178 | 1.99931 | 5.42986 | 0.01261 | 7.44178  |
| C    | 12 | -0.25490 | 1.99935 | 4.24022 | 0.01532 | 6.25490  |
| H    | 13 | 0.23355  | 0.00000 | 0.76510 | 0.00134 | 0.76645  |
| H    | 14 | 0.23170  | 0.00000 | 0.76642 | 0.00188 | 0.76830  |
| C    | 15 | -0.69017 | 1.99945 | 4.68354 | 0.00719 | 6.69017  |
| H    | 16 | 0.22832  | 0.00000 | 0.77069 | 0.00099 | 0.77168  |
| H    | 17 | 0.24164  | 0.00000 | 0.75747 | 0.00088 | 0.75836  |
| H    | 18 | 0.23416  | 0.00000 | 0.76482 | 0.00102 | 0.76584  |
| C    | 19 | -0.25490 | 1.99935 | 4.24022 | 0.01532 | 6.25490  |
| H    | 20 | 0.23170  | 0.00000 | 0.76642 | 0.00188 | 0.76830  |
| H    | 21 | 0.23355  | 0.00000 | 0.76510 | 0.00134 | 0.76645  |
| C    | 22 | -0.69018 | 1.99945 | 4.68354 | 0.00719 | 6.69018  |
| H    | 23 | 0.24164  | 0.00000 | 0.75747 | 0.00088 | 0.75836  |

|   |    |          |         |         |         |          |
|---|----|----------|---------|---------|---------|----------|
| H | 24 | 0.22832  | 0.00000 | 0.77069 | 0.00099 | 0.77168  |
| H | 25 | 0.23416  | 0.00000 | 0.76483 | 0.00102 | 0.76584  |
| S | 26 | 0.23736  | 9.99925 | 5.72734 | 0.03605 | 15.76264 |
| H | 27 | 0.23968  | 0.00000 | 0.75906 | 0.00125 | 0.76032  |
| H | 28 | 0.27205  | 0.00000 | 0.72522 | 0.00273 | 0.72795  |
| C | 29 | -0.17184 | 1.99866 | 4.15338 | 0.01981 | 6.17184  |
| C | 30 | -0.25019 | 1.99897 | 4.23683 | 0.01439 | 6.25019  |
| C | 31 | -0.22673 | 1.99867 | 4.20409 | 0.02398 | 6.22673  |
| H | 32 | 0.23697  | 0.00000 | 0.76208 | 0.00095 | 0.76303  |
| C | 33 | -0.21371 | 1.99909 | 4.20086 | 0.01376 | 6.21371  |
| C | 34 | -0.21224 | 1.99898 | 4.19739 | 0.01588 | 6.21224  |
| H | 35 | 0.24004  | 0.00000 | 0.75912 | 0.00084 | 0.75996  |
| C | 36 | -0.24770 | 1.99908 | 4.23483 | 0.01379 | 6.24770  |
| H | 37 | 0.23949  | 0.00000 | 0.75967 | 0.00084 | 0.76051  |
| S | 38 | 0.06633  | 9.99927 | 5.89503 | 0.03937 | 15.93367 |
| C | 39 | -0.17184 | 1.99866 | 4.15338 | 0.01981 | 6.17184  |
| C | 40 | -0.22673 | 1.99867 | 4.20409 | 0.02398 | 6.22673  |
| C | 41 | -0.25019 | 1.99897 | 4.23683 | 0.01439 | 6.25019  |
| H | 42 | 0.23697  | 0.00000 | 0.76208 | 0.00095 | 0.76303  |
| C | 43 | -0.21224 | 1.99898 | 4.19739 | 0.01588 | 6.21224  |
| C | 44 | -0.21372 | 1.99909 | 4.20086 | 0.01376 | 6.21372  |
| H | 45 | 0.24004  | 0.00000 | 0.75912 | 0.00084 | 0.75996  |
| C | 46 | -0.24770 | 1.99908 | 4.23483 | 0.01379 | 6.24770  |
| H | 47 | 0.23949  | 0.00000 | 0.75967 | 0.00084 | 0.76051  |
| S | 48 | 0.06634  | 9.99927 | 5.89503 | 0.03937 | 15.93366 |
| H | 49 | 0.24802  | 0.00000 | 0.74966 | 0.00232 | 0.75198  |
| H | 50 | 0.24803  | 0.00000 | 0.74965 | 0.00232 | 0.75197  |
| H | 51 | 0.27205  | 0.00000 | 0.72522 | 0.00273 | 0.72795  |
| H | 52 | 0.24670  | 0.00000 | 0.75210 | 0.00120 | 0.75330  |
| H | 53 | 0.12455  | 0.00000 | 0.87445 | 0.00100 | 0.87545  |
| H | 54 | 0.24670  | 0.00000 | 0.75210 | 0.00120 | 0.75330  |
| H | 55 | 0.12455  | 0.00000 | 0.87445 | 0.00100 | 0.87545  |

**Table S2.** Coordinates parameters for TSPH<sub>2</sub>:

| Center<br>Number | Coordinates (Angstroms) |           |           |
|------------------|-------------------------|-----------|-----------|
|                  | X                       | Y         | Z         |
| 1                | 0.000132                | 0.028158  | -0.953795 |
| 2                | -1.141835               | 0.725110  | -0.846700 |
| 3                | 1.142019                | 0.725260  | -0.846798 |
| 4                | -1.195801               | 2.099246  | -0.622226 |
| 5                | 1.195824                | 2.099400  | -0.622320 |
| 6                | -0.000031               | 2.844720  | -0.503011 |
| 7                | -2.166618               | 2.568401  | -0.526723 |
| 8                | 2.415563                | -0.076527 | -0.985819 |
| 9                | -2.415267               | -0.076875 | -0.985712 |
| 10               | 3.341532                | -0.089022 | 0.630747  |
| 11               | -0.000105               | 4.210097  | -0.305411 |
| 12               | -1.254761               | 4.943675  | -0.133275 |
| 13               | -1.048427               | 5.992638  | -0.370175 |
| 14               | -1.972247               | 4.601033  | -0.888048 |
| 15               | -1.878776               | 4.847226  | 1.266045  |
| 16               | -1.214258               | 5.272509  | 2.025125  |
| 17               | -2.084726               | 3.808460  | 1.541657  |
| 18               | -2.824780               | 5.401021  | 1.294411  |
| 19               | 1.254487                | 4.943818  | -0.133423 |
| 20               | 1.971926                | 4.601243  | -0.888269 |
| 21               | 1.048013                | 5.992756  | -0.370316 |
| 22               | 1.878664                | 4.847449  | 1.265831  |
| 23               | 2.084740                | 3.808705  | 1.541433  |
| 24               | 1.214188                | 5.272678  | 2.024978  |
| 25               | 2.824618                | 5.401336  | 1.294089  |
| 26               | 3.341079                | -0.089701 | 0.631078  |
| 27               | 2.166586                | 2.568682  | -0.526873 |
| 28               | -2.159989               | -1.101515 | -1.258809 |
| 29               | -4.858603               | -2.402458 | 0.214595  |
| 30               | -6.042783               | -3.067161 | -0.137559 |
| 31               | -4.818157               | -0.993453 | 0.159114  |
| 32               | -6.086804               | -4.152102 | -0.097920 |
| 33               | -7.169449               | -2.348880 | -0.531822 |
| 34               | -5.963705               | -0.288002 | -0.231878 |
| 35               | -8.076497               | -2.885223 | -0.797782 |
| 36               | -7.137339               | -0.954536 | -0.578863 |
| 37               | -8.016384               | -0.392210 | -0.880218 |
| 38               | -3.399128               | -3.287168 | 0.740364  |
| 39               | 4.858680                | -2.402617 | 0.213926  |
| 40               | 4.818053                | -0.993579 | 0.159468  |
| 41               | 6.043113                | -3.066890 | -0.138188 |
| 42               | 6.087270                | -4.151854 | -0.099341 |
| 43               | 5.963676                | -0.287672 | -0.230484 |
| 44               | 7.169854                | -2.348154 | -0.531410 |
| 45               | 8.077099                | -2.884167 | -0.797363 |
| 46               | 7.137564                | -0.953780 | -0.577432 |
| 47               | 8.016668                | -0.391105 | -0.877963 |

|    |           |           |           |
|----|-----------|-----------|-----------|
| 48 | 3.399097  | -3.287924 | 0.738389  |
| 49 | 3.080786  | 0.354962  | -1.740187 |
| 50 | -3.080167 | 0.354021  | -1.740710 |
| 51 | 2.160519  | -1.101012 | -1.259714 |
| 52 | 5.920353  | 0.797197  | -0.255325 |
| 53 | 3.915251  | -4.516250 | 0.510900  |
| 54 | -5.920529 | 0.796855  | -0.257497 |
| 55 | -3.914970 | -4.515739 | 0.513485  |

---

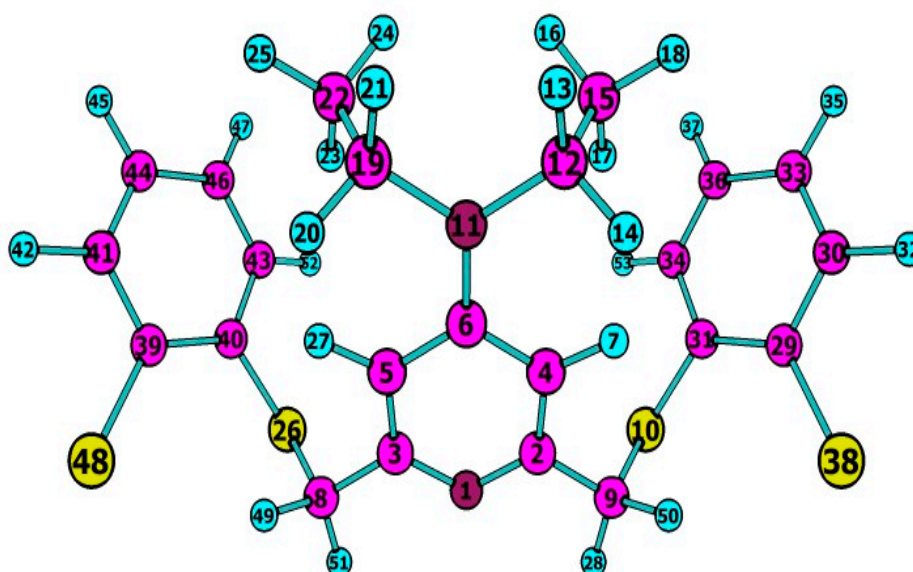

**Figure S2:** Structure of TSP<sup>2-</sup>

**Table S3.** Summary of Natural Population Analysis (NPA) for TSP<sup>2-</sup> anion.

| Atom | No | Charge   | Core    | Valence | Rydberg | Total    |
|------|----|----------|---------|---------|---------|----------|
| N    | 1  | -0.51020 | 1.99938 | 5.49090 | 0.01993 | 7.51020  |
| C    | 2  | 0.21981  | 1.99907 | 3.75563 | 0.02550 | 5.78019  |
| C    | 3  | 0.21981  | 1.99907 | 3.75563 | 0.02550 | 5.78019  |
| C    | 4  | -0.33076 | 1.99896 | 4.32084 | 0.01096 | 6.33076  |
| C    | 5  | -0.33076 | 1.99896 | 4.32084 | 0.01096 | 6.33076  |
| C    | 6  | 0.20540  | 1.99904 | 3.77673 | 0.01884 | 5.79460  |
| H    | 7  | 0.24504  | 0.00000 | 0.75365 | 0.00131 | 0.75496  |
| C    | 8  | -0.60582 | 1.99914 | 4.59162 | 0.01506 | 6.60582  |
| C    | 9  | -0.60581 | 1.99914 | 4.59162 | 0.01505 | 6.60581  |
| S    | 10 | 0.21314  | 9.99924 | 5.74910 | 0.03852 | 15.78686 |
| N    | 11 | -0.45570 | 1.99931 | 5.44383 | 0.01255 | 7.45570  |
| C    | 12 | -0.24959 | 1.99936 | 4.23498 | 0.01526 | 6.24959  |
| H    | 13 | 0.21220  | 0.00000 | 0.78618 | 0.00161 | 0.78780  |
| H    | 14 | 0.23670  | 0.00000 | 0.76125 | 0.00205 | 0.76330  |
| C    | 15 | -0.68687 | 1.99944 | 4.68002 | 0.00741 | 6.68687  |
| H    | 16 | 0.21019  | 0.00000 | 0.78863 | 0.00118 | 0.78981  |
| H    | 17 | 0.25782  | 0.00000 | 0.74108 | 0.00110 | 0.74218  |
| H    | 18 | 0.22478  | 0.00000 | 0.77390 | 0.00132 | 0.77522  |
| C    | 19 | -0.24960 | 1.99936 | 4.23499 | 0.01526 | 6.24960  |
| H    | 20 | 0.23667  | 0.00000 | 0.76128 | 0.00205 | 0.76333  |
| H    | 21 | 0.21222  | 0.00000 | 0.78617 | 0.00161 | 0.78778  |
| C    | 22 | -0.68686 | 1.99944 | 4.68001 | 0.00741 | 6.68686  |
| H    | 23 | 0.25781  | 0.00000 | 0.74109 | 0.00110 | 0.74219  |
| H    | 24 | 0.21021  | 0.00000 | 0.78862 | 0.00118 | 0.78979  |
| H    | 25 | 0.22479  | 0.00000 | 0.77389 | 0.00132 | 0.77521  |
| S    | 26 | 0.21314  | 9.99924 | 5.74910 | 0.03852 | 15.78686 |

|   |    |          |         |         |         |          |
|---|----|----------|---------|---------|---------|----------|
| H | 27 | 0.24503  | 0.00000 | 0.75366 | 0.00131 | 0.75497  |
| H | 28 | 0.25233  | 0.00000 | 0.74538 | 0.00229 | 0.74767  |
| C | 29 | -0.18021 | 1.99878 | 4.15644 | 0.02500 | 6.18021  |
| C | 30 | -0.25823 | 1.99899 | 4.24285 | 0.01639 | 6.25823  |
| C | 31 | -0.24501 | 1.99868 | 4.22439 | 0.02194 | 6.24501  |
| H | 32 | 0.22396  | 0.00000 | 0.77413 | 0.00192 | 0.77604  |
| C | 33 | -0.25442 | 1.99906 | 4.24187 | 0.01348 | 6.25442  |
| C | 34 | -0.23923 | 1.99899 | 4.22460 | 0.01565 | 6.23923  |
| H | 35 | 0.20342  | 0.00000 | 0.79528 | 0.00129 | 0.79658  |
| C | 36 | -0.30913 | 1.99906 | 4.29554 | 0.01452 | 6.30913  |
| H | 37 | 0.20803  | 0.00000 | 0.79090 | 0.00107 | 0.79197  |
| S | 38 | -0.47654 | 9.99943 | 6.45118 | 0.02593 | 16.47654 |
| C | 39 | -0.18021 | 1.99878 | 4.15644 | 0.02500 | 6.18021  |
| C | 40 | -0.24500 | 1.99868 | 4.22438 | 0.02194 | 6.24500  |
| C | 41 | -0.25823 | 1.99899 | 4.24284 | 0.01639 | 6.25823  |
| H | 42 | 0.22395  | 0.00000 | 0.77413 | 0.00192 | 0.77605  |
| C | 43 | -0.23925 | 1.99899 | 4.22461 | 0.01565 | 6.23925  |
| C | 44 | -0.25442 | 1.99906 | 4.24188 | 0.01348 | 6.25442  |
| H | 45 | 0.20342  | 0.00000 | 0.79529 | 0.00129 | 0.79658  |
| C | 46 | -0.30911 | 1.99906 | 4.29553 | 0.01452 | 6.30911  |
| H | 47 | 0.20803  | 0.00000 | 0.79090 | 0.00107 | 0.79197  |
| S | 48 | -0.47655 | 9.99943 | 6.45119 | 0.02593 | 16.47655 |
| H | 49 | 0.27682  | 0.00000 | 0.71958 | 0.00360 | 0.72318  |
| H | 50 | 0.27682  | 0.00000 | 0.71958 | 0.00360 | 0.72318  |
| H | 51 | 0.25233  | 0.00000 | 0.74538 | 0.00229 | 0.74767  |
| H | 52 | 0.23183  | 0.00000 | 0.76675 | 0.00142 | 0.76817  |
| H | 53 | 0.23183  | 0.00000 | 0.76675 | 0.00142 | 0.76817  |

=====



**Table S4.** Coordinates parameters for TSP<sup>2-</sup> anion:

| Center<br>Number | Coordinates (Angstroms) |           |           |
|------------------|-------------------------|-----------|-----------|
|                  | X                       | Y         | Z         |
| 1                | 0.000007                | -2.206649 | -0.478068 |
| 2                | -1.148604               | -1.522143 | -0.634309 |
| 3                | 1.148520                | -1.521993 | -0.634396 |
| 4                | -1.198240               | -0.162640 | -0.949640 |
| 5                | 1.197962                | -0.162481 | -0.949703 |
| 6                | -0.000193               | 0.560843  | -1.128517 |
| 7                | -2.170811               | 0.301091  | -1.052241 |
| 8                | 2.427777                | -2.308862 | -0.504302 |
| 9                | -2.427745               | -2.309178 | -0.504067 |
| 10               | -3.346102               | -2.111806 | 1.097816  |
| 11               | -0.000280               | 1.900941  | -1.503182 |
| 12               | -1.252039               | 2.634608  | -1.656012 |
| 13               | -1.049094               | 3.481791  | -2.324079 |
| 14               | -1.975760               | 2.000338  | -2.180715 |
| 15               | -1.878547               | 3.150008  | -0.352205 |
| 16               | -1.206589               | 3.851228  | 0.156629  |
| 17               | -2.103777               | 2.328876  | 0.333622  |
| 18               | -2.822996               | 3.666526  | -0.564315 |
| 19               | 1.251357                | 2.635100  | -1.654774 |
| 20               | 1.975544                | 2.001562  | -2.179741 |
| 21               | 1.048443                | 3.482842  | -2.322125 |
| 22               | 1.877087                | 3.149447  | -0.350183 |
| 23               | 2.102173                | 2.327727  | 0.334980  |
| 24               | 1.204692                | 3.850015  | 0.158968  |
| 25               | 2.821524                | 3.666369  | -0.561343 |
| 26               | 3.346245                | -2.111549 | 1.097521  |
| 27               | 2.170468                | 0.301353  | -1.052453 |
| 28               | -2.186930               | -3.375107 | -0.540125 |
| 29               | -5.188457               | -0.213100 | 0.014199  |
| 30               | -5.808158               | 1.061405  | 0.178330  |
| 31               | -4.178994               | -0.525639 | 0.987828  |
| 32               | -6.573931               | 1.326757  | -0.546722 |
| 33               | -5.495077               | 1.939964  | 1.205949  |
| 34               | -3.857150               | 0.383965  | 2.010132  |
| 35               | -6.019604               | 2.894060  | 1.275343  |
| 36               | -4.509899               | 1.608546  | 2.145971  |
| 37               | -4.244608               | 2.290776  | 2.951358  |
| 38               | -5.684924               | -1.244096 | -1.303409 |
| 39               | 5.188726                | -0.212990 | 0.013810  |
| 40               | 4.179336                | -0.525486 | 0.987528  |
| 41               | 5.808591                | 1.061430  | 0.177966  |
| 42               | 6.574292                | 1.326759  | -0.547171 |
| 43               | 3.857760                | 0.384056  | 2.009972  |
| 44               | 5.495773                | 1.939925  | 1.205720  |
| 45               | 6.020432                | 2.893947  | 1.275136  |
| 46               | 4.510696                | 1.608531  | 2.145854  |

|    |           |           |           |
|----|-----------|-----------|-----------|
| 47 | 4.245604  | 2.290712  | 2.951349  |
| 48 | 5.684922  | -1.243930 | -1.303947 |
| 49 | 3.154463  | -2.072519 | -1.289090 |
| 50 | -3.154531 | -2.073017 | -1.288818 |
| 51 | 2.187100  | -3.374822 | -0.540425 |
| 52 | 3.073853  | 0.107509  | 2.711026  |
| 53 | -3.073185 | 0.107386  | 2.711106  |

---

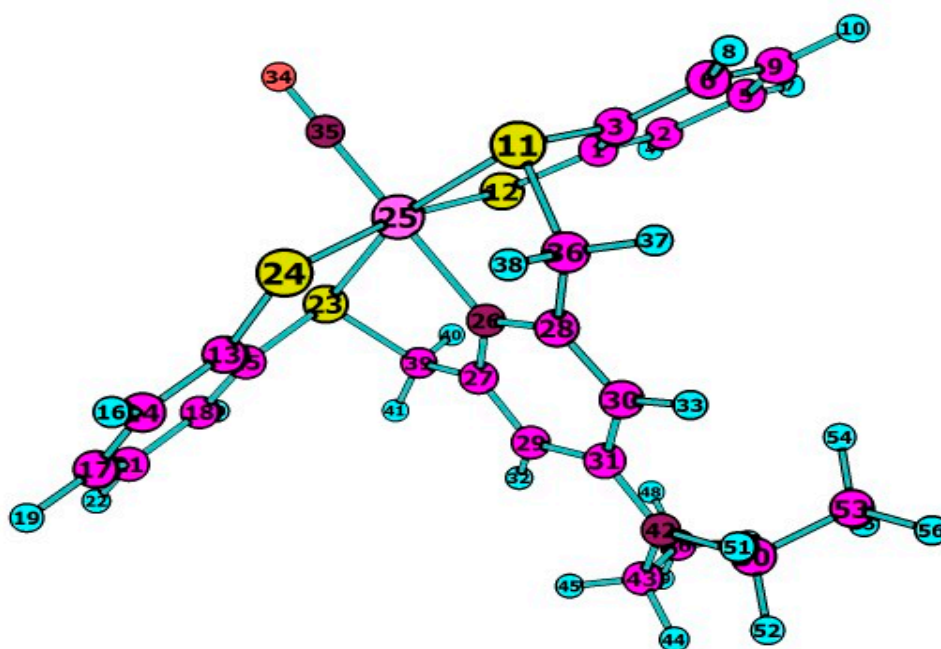

**Figure S3:** Structure of [RuNOTSP]<sup>+</sup> cation.

**Table S5.** Summary of Natural Population Analysis (NPA) of [RuNOTSP]<sup>+</sup>:

| Atom | No | Charge   | Core     | Valence | Rydberg | Total    |
|------|----|----------|----------|---------|---------|----------|
| C    | 1  | -0.18382 | 1.99853  | 4.16490 | 0.02039 | 6.18382  |
| C    | 2  | -0.22147 | 1.99884  | 4.20636 | 0.01627 | 6.22147  |
| C    | 3  | -0.25546 | 1.99850  | 4.23616 | 0.02079 | 6.25546  |
| H    | 4  | 0.25619  | 0.00000  | 0.74257 | 0.00124 | 0.74381  |
| C    | 5  | -0.19494 | 1.99892  | 4.18172 | 0.01430 | 6.19494  |
| C    | 6  | -0.21998 | 1.99881  | 4.20479 | 0.01638 | 6.21998  |
| H    | 7  | 0.25474  | 0.00000  | 0.74432 | 0.00094 | 0.74526  |
| H    | 8  | 0.25093  | 0.00000  | 0.74784 | 0.00123 | 0.74907  |
| C    | 9  | -0.23233 | 1.99891  | 4.21858 | 0.01483 | 6.23233  |
| H    | 10 | 0.25433  | 0.00000  | 0.74477 | 0.00090 | 0.74567  |
| S    | 11 | 0.68887  | 9.99853  | 5.26937 | 0.04322 | 15.31113 |
| S    | 12 | 0.12102  | 9.99886  | 5.85063 | 0.02950 | 15.87898 |
| C    | 13 | -0.18506 | 1.99853  | 4.16570 | 0.02083 | 6.18506  |
| C    | 14 | -0.21977 | 1.99884  | 4.20465 | 0.01628 | 6.21977  |
| C    | 15 | -0.25187 | 1.99850  | 4.23279 | 0.02058 | 6.25187  |
| H    | 16 | 0.25695  | 0.00000  | 0.74182 | 0.00124 | 0.74305  |
| C    | 17 | -0.19507 | 1.99892  | 4.18184 | 0.01431 | 6.19507  |
| C    | 18 | -0.22051 | 1.99881  | 4.20540 | 0.01630 | 6.22051  |
| H    | 19 | 0.25520  | 0.00000  | 0.74387 | 0.00094 | 0.74480  |
| H    | 20 | 0.24987  | 0.00000  | 0.74889 | 0.00124 | 0.75013  |
| C    | 21 | -0.22987 | 1.99892  | 4.21613 | 0.01482 | 6.22987  |
| H    | 22 | 0.25459  | 0.00000  | 0.74451 | 0.00090 | 0.74541  |
| S    | 23 | 0.69449  | 9.99851  | 5.26383 | 0.04317 | 15.30551 |
| S    | 24 | 0.15628  | 9.99880  | 5.81450 | 0.03041 | 15.84372 |
| Ru   | 25 | -0.67395 | 35.97393 | 8.66516 | 0.03485 | 44.67395 |
| N    | 26 | -0.43862 | 1.99913  | 5.41815 | 0.02135 | 7.43862  |
| C    | 27 | 0.26107  | 1.99888  | 3.71942 | 0.02063 | 5.73893  |

|   |    |          |         |         |         |         |
|---|----|----------|---------|---------|---------|---------|
| C | 28 | 0.26071  | 1.99888 | 3.71980 | 0.02061 | 5.73929 |
| C | 29 | -0.30428 | 1.99880 | 4.29411 | 0.01137 | 6.30428 |
| C | 30 | -0.30443 | 1.99880 | 4.29424 | 0.01138 | 6.30443 |
| C | 31 | 0.26035  | 1.99893 | 3.72155 | 0.01916 | 5.73965 |
| H | 32 | 0.25520  | 0.00000 | 0.74379 | 0.00101 | 0.74480 |
| H | 33 | 0.25518  | 0.00000 | 0.74381 | 0.00102 | 0.74482 |
| O | 34 | -0.14870 | 1.99974 | 6.13336 | 0.01560 | 8.14870 |
| N | 35 | 0.45495  | 1.99883 | 4.49840 | 0.04783 | 6.54505 |
| C | 36 | -0.61742 | 1.99907 | 4.60391 | 0.01445 | 6.61742 |
| H | 37 | 0.28214  | 0.00000 | 0.71625 | 0.00161 | 0.71786 |
| H | 38 | 0.29928  | 0.00000 | 0.69923 | 0.00149 | 0.70072 |
| C | 39 | -0.61769 | 1.99907 | 4.60427 | 0.01434 | 6.61769 |
| H | 40 | 0.29868  | 0.00000 | 0.69981 | 0.00150 | 0.70132 |
| H | 41 | 0.28194  | 0.00000 | 0.71647 | 0.00159 | 0.71806 |
| N | 42 | -0.40769 | 1.99914 | 5.39593 | 0.01262 | 7.40769 |
| C | 43 | -0.25816 | 1.99922 | 4.24379 | 0.01516 | 6.25816 |
| H | 44 | 0.25003  | 0.00000 | 0.74864 | 0.00133 | 0.74997 |
| H | 45 | 0.23565  | 0.00000 | 0.76258 | 0.00177 | 0.76435 |
| C | 46 | -0.68342 | 1.99929 | 4.67662 | 0.00752 | 6.68342 |
| H | 47 | 0.23707  | 0.00000 | 0.76186 | 0.00107 | 0.76293 |
| H | 48 | 0.23006  | 0.00000 | 0.76893 | 0.00101 | 0.76994 |
| H | 49 | 0.24874  | 0.00000 | 0.75026 | 0.00100 | 0.75126 |
| C | 50 | -0.25819 | 1.99922 | 4.24380 | 0.01517 | 6.25819 |
| H | 51 | 0.23606  | 0.00000 | 0.76218 | 0.00176 | 0.76394 |
| H | 52 | 0.25005  | 0.00000 | 0.74861 | 0.00134 | 0.74995 |
| C | 53 | -0.68344 | 1.99929 | 4.67665 | 0.00750 | 6.68344 |
| H | 54 | 0.22983  | 0.00000 | 0.76915 | 0.00101 | 0.77017 |
| H | 55 | 0.23708  | 0.00000 | 0.76185 | 0.00107 | 0.76292 |
| H | 56 | 0.24862  | 0.00000 | 0.75038 | 0.00100 | 0.75138 |

=====

**Table S6.** Coordinates parameters for [RuNOTSP]<sup>+</sup> cation:

| Center<br>Number | Coordinates (Angstroms) |           |           |
|------------------|-------------------------|-----------|-----------|
|                  | X                       | Y         | Z         |
| 1                | 1.800256                | -2.653295 | 0.835584  |
| 2                | 2.893118                | -3.157083 | 1.565152  |
| 3                | 1.860150                | -2.786274 | -0.548880 |
| 4                | 2.881345                | -3.071078 | 2.644299  |
| 5                | 3.964014                | -3.757180 | 0.940776  |
| 6                | 2.937139                | -3.404952 | -1.187675 |
| 7                | 4.787776                | -4.136447 | 1.534594  |
| 8                | 2.937666                | -3.504169 | -2.267066 |
| 9                | 3.993274                | -3.887143 | -0.448139 |
| 10               | 4.830893                | -4.365133 | -0.938440 |
| 11               | 0.515831                | -2.195527 | -1.587563 |
| 12               | 0.489253                | -1.916374 | 1.746906  |
| 13               | -3.282282               | 0.868681  | -0.935629 |
| 14               | -4.110925               | 1.677137  | -1.733916 |
| 15               | -3.329386               | 1.088795  | 0.437883  |
| 16               | -4.100788               | 1.533174  | -2.806949 |
| 17               | -4.931542               | 2.636117  | -1.181255 |
| 18               | -4.167869               | 2.049217  | 1.006548  |
| 19               | -5.559134               | 3.241387  | -1.825291 |
| 20               | -4.189706               | 2.178050  | 2.082537  |
| 21               | -4.965744               | 2.829617  | 0.199870  |
| 22               | -5.615199               | 3.578055  | 0.634245  |
| 23               | -2.336218               | 0.084601  | 1.551867  |
| 24               | -2.285447               | -0.336401 | -1.743957 |
| 25               | -1.088740               | -1.322752 | 0.015916  |
| 26               | 0.155589                | 0.379788  | -0.074956 |
| 27               | 0.055442                | 1.395189  | 0.834838  |
| 28               | 1.103415                | 0.516596  | -1.051110 |
| 29               | 0.849587                | 2.511084  | 0.802690  |
| 30               | 1.942599                | 1.596911  | -1.132642 |
| 31               | 1.844590                | 2.661100  | -0.198584 |
| 32               | 0.707765                | 3.264498  | 1.557531  |
| 33               | 2.668575                | 1.624488  | -1.926175 |
| 34               | -2.269047               | -3.713560 | 0.975794  |
| 35               | -1.896245               | -2.721741 | 0.404103  |
| 36               | 1.165947                | -0.580691 | -2.121404 |
| 37               | 2.189631                | -0.708061 | -2.467582 |
| 38               | 0.557761                | -0.271647 | -2.972864 |
| 39               | -0.972544               | 1.218912  | 1.958914  |
| 40               | -0.471492               | 0.795671  | 2.830725  |
| 41               | -1.385868               | 2.184405  | 2.243600  |
| 42               | 2.646660                | 3.782657  | -0.275302 |
| 43               | 2.554731                | 4.864018  | 0.737635  |
| 44               | 2.983000                | 5.758437  | 0.286272  |
| 45               | 1.503921                | 5.079891  | 0.933606  |
| 46               | 3.292255                | 4.555971  | 2.061151  |

|    |          |          |           |
|----|----------|----------|-----------|
| 47 | 4.356678 | 4.436307 | 1.889498  |
| 48 | 2.913262 | 3.649660 | 2.521920  |
| 49 | 3.146086 | 5.381861 | 2.750824  |
| 50 | 3.705319 | 3.901180 | -1.309185 |
| 51 | 3.304720 | 3.571500 | -2.268401 |
| 52 | 3.933693 | 4.961850 | -1.408965 |
| 53 | 5.002783 | 3.127996 | -0.978477 |
| 54 | 4.806273 | 2.070174 | -0.838127 |
| 55 | 5.462407 | 3.515934 | -0.075683 |
| 56 | 5.704997 | 3.243610 | -1.798625 |

---
